# Supplementary figures and images for: Ultra-broadband Plasmon Resonance in Gold Nanoparticles Precipitated in ZnO-Al2O3-SiO2 Glass
Source: Preprints.org preprint supplement (doi:10.20944/preprints202404.0283.v1), 2024-04-03

**Supplementary**


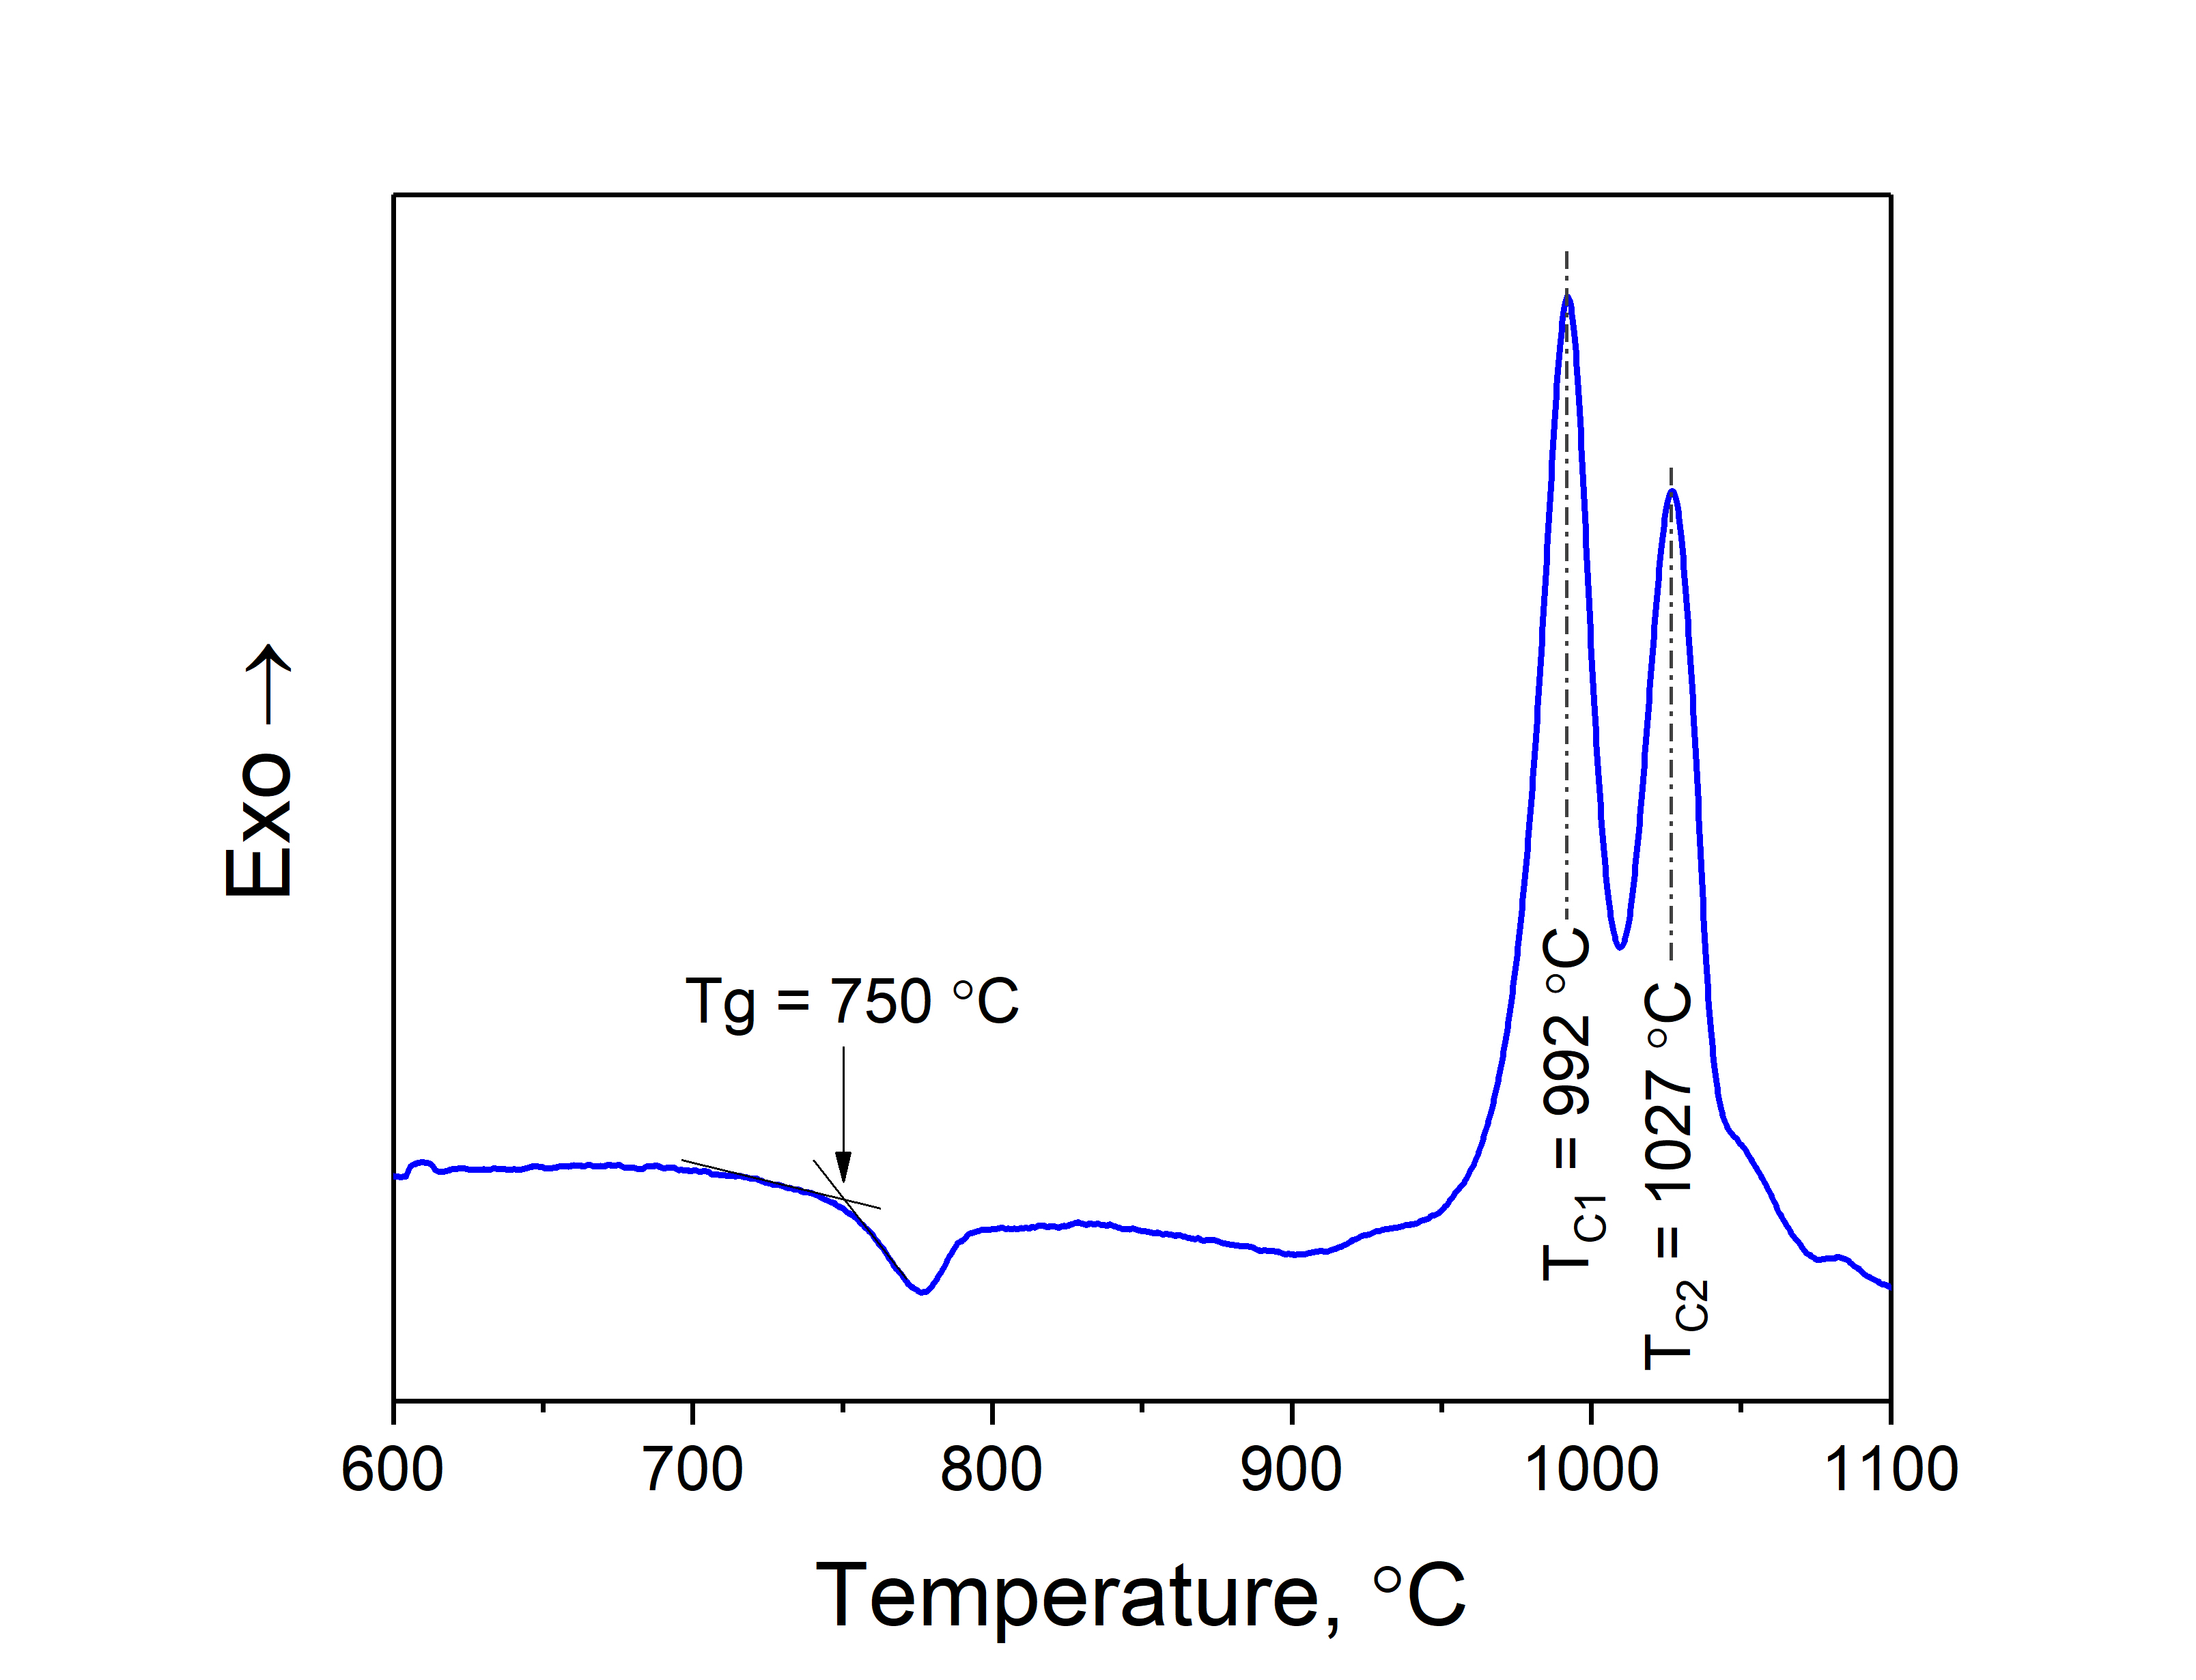


**Figure S1.** DSC curve of the synthetized glass.

Supplement: Supplementary file 1 [file supplementary]
